# Supplementary material
Source: publisher figshare collection journal article supplement (https://acs.figshare.com/ndownloader/files/27897050)
Supplement: Supplementary file 1 [file 27897050]

# Supporting Information

Hydrophilic Anthraquinone-Substituted Polymer: Its  
Environmentally Friendly Preparation and Efficient  
Charge/Proton-Storage Capability for Polymer–Air  
Secondary Batteries

*Kouki Oka, Saki Murao, Miho Kataoka, Hiroyuki Nishide, Kenichi Oyaizu\**

Department of Applied Chemistry and Research Institute for Science and Engineering,  
Waseda University, 3-4-1 Okubo, Shinjuku, Tokyo 169-8555, Japan

Corresponding Author \*oyaizu@waseda.jp.

## **Supplementary Method**

### **1. Electrode preparation**

The polymer/carbon composite electrodes were prepared by coating the slurry of the polymer single-walled carbon nanotube (SWNT), polyvinylidene difluoride (5:5:1 in w/w/w), and *N*-methyl pyrrolidone (NMP) onto glassy carbon substrates. The polymer carbon composite was coated on a glassy carbon plate with a thickness of ca. 10  $\mu\text{m}$ . The mass loading of the polymer was adjusted to ca. 1.0 mg.

### **2. Electrochemical measurement**

A tailor-made glass cell (20  $\text{cm}^2$  electrolyte, Watanabe Kagaku Co.) was employed as the electrochemical cell.

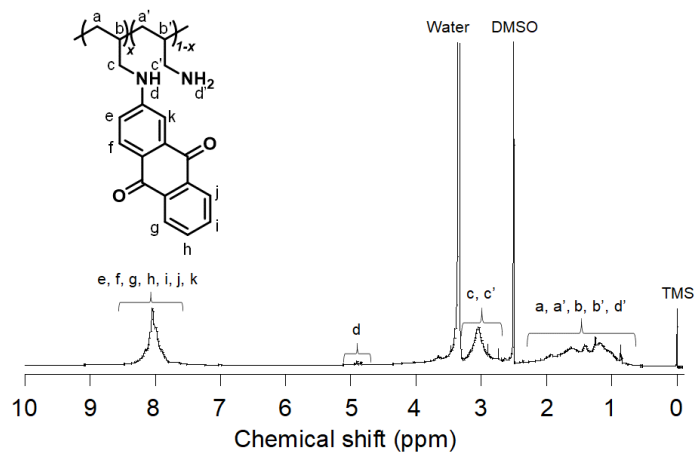

**Figure S1.** 500 MHz  $^1\text{H}$  NMR spectrum (dimethyl sulfoxide- $d_6$ ) of anthraquinone substituted poly(allylamine).

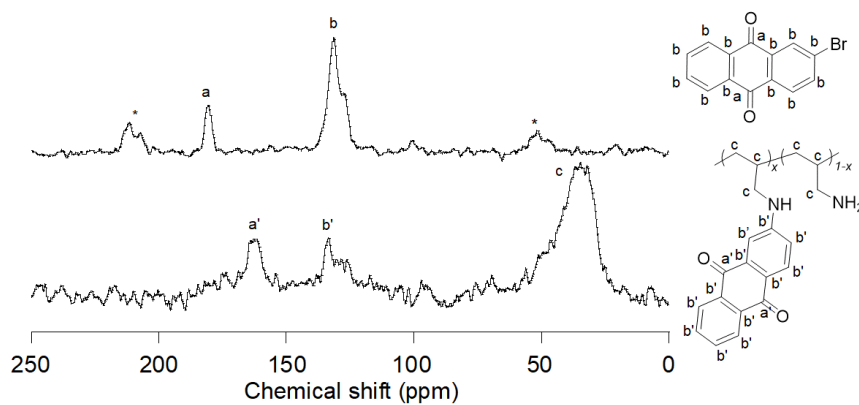

**Figure S2** Solid state  $^{13}\text{C}$ -NMR spectra of anthraquinone substituted poly(allylamine) (\* spinning side band).

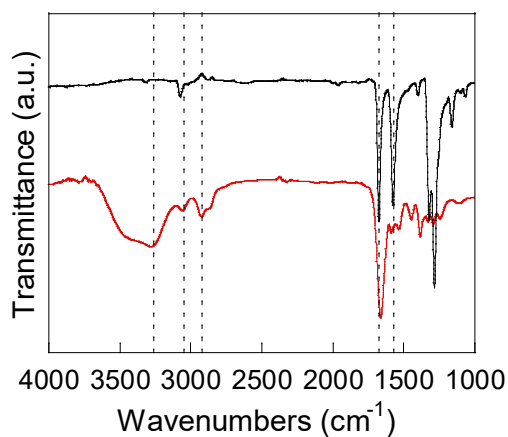

**Figure S3** IR spectra of bromoanthraquinone (black) and anthraquinone-substituted poly(allylamine) (red).

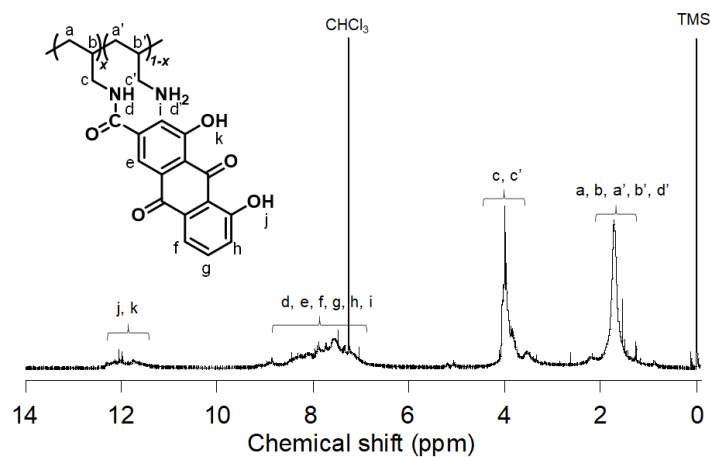

**Figure S4.** 500 MHz  $^1\text{H}$  NMR spectrum ( $\text{CDCl}_3$ ) of PDHA.

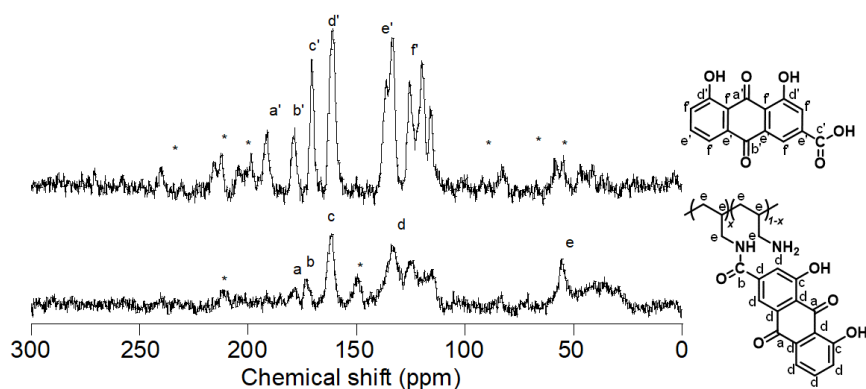

**Figure S5.** Solid state  $^{13}\text{C}$ -NMR spectra of a) bromoanthraquinone and b) PDHA (\* Spinning side band).

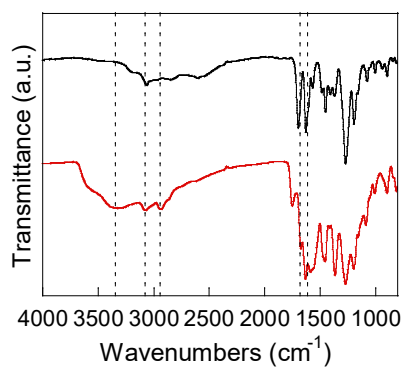

**Figure S6.** IR spectra of 4,5-dihydroxyanthraquinone-2-carboxylic acid (black) and PDHA (red).

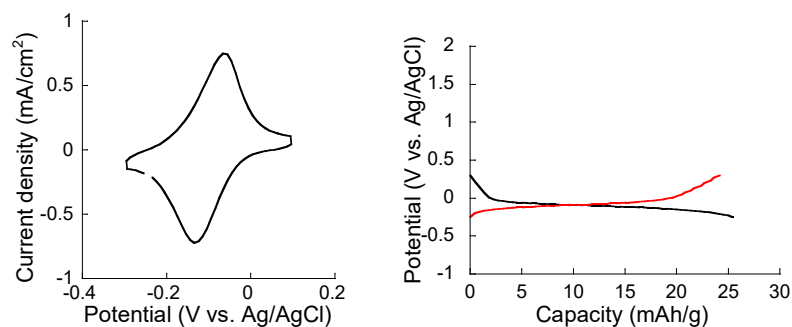

**Figure S7.** a) Cyclic voltammogram and b) Charging (black) and discharging (red) curves of the anthraquinone substituted poly(allylamine)/SWNT composite electrode in 0.5 M H<sub>2</sub>SO<sub>4</sub> aqueous solution at 10 C.

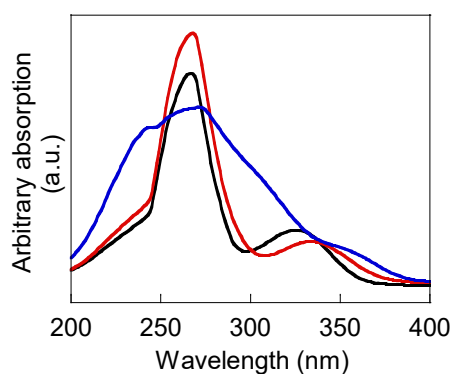

**Figure S8.** The UV-vis absorption spectra (arbitrary absorption) of anthraquinone (0.1 mM) (black), poly(vinylanthraquinone) (0.1 mM) (red), and anthraquinone substituted poly(allylamine) (0.1 mM) (blue) in NMP.

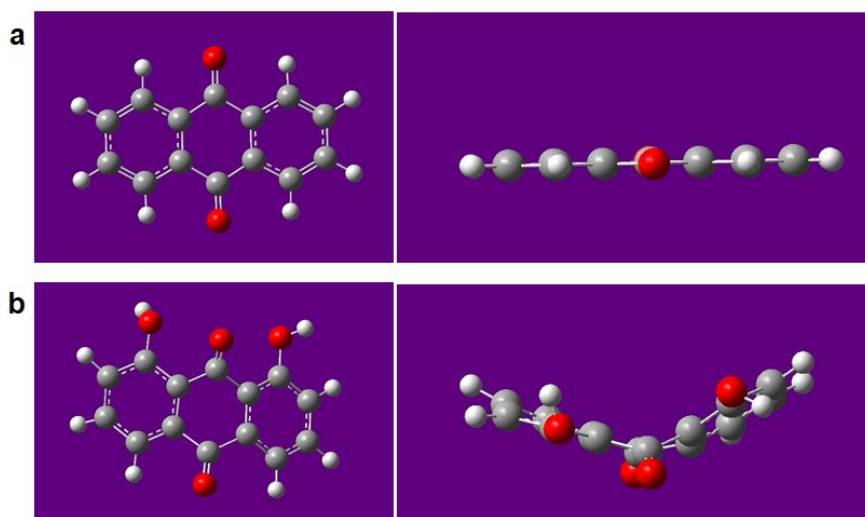

**Figure S9.** UM06/6-31G(d,p) optimized structures of (a) anthraquinone and (b) DHA.

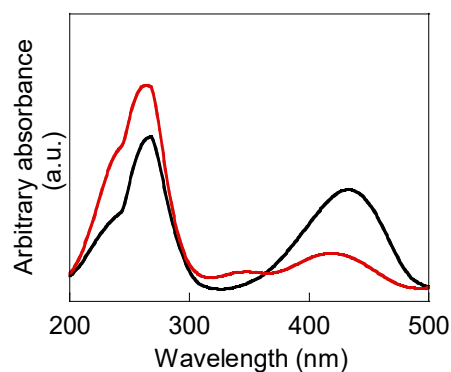

**Figure S10.** The UV-vis absorption spectra (arbitrary absorption) of DHA (0.1 mM) (black) and PDHA (0.1 mM) (red) in NMP.

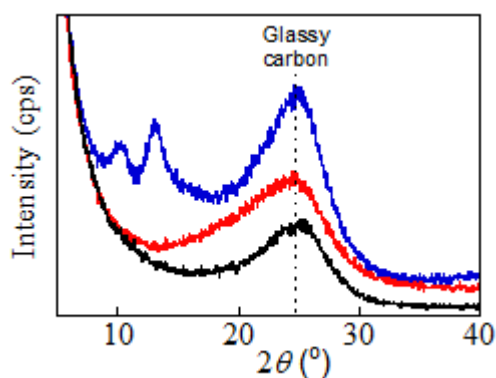

**Figure S11.** XRD patterns of the thin films of poly(vinylanthraquinone) (blue) and PDHA (red), and glassy carbon substrate (black). These thin films are formed on the glassy carbon substrate.

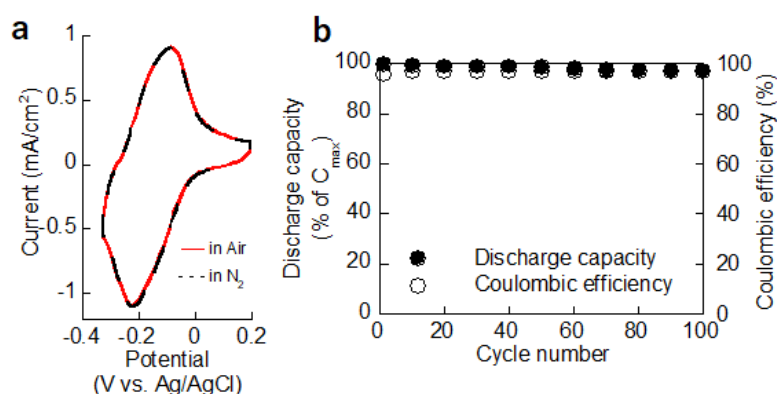

**Figure S12.** a) Cyclic voltammograms of the PDHA/SWNT composite electrode in 0.5 M H<sub>2</sub>SO<sub>4</sub> aqueous solution in air (red solid line) and in nitrogen (black dotted line) at a scan rate of 10 mV/s. b) Capacity retention for 100 cycles on galvanostatic charge and discharge at 60 C.

**Table S1** Characteristics of other organic-air battery concepts

| Reference No. | Anode-active Polymer (conductive additives)                                                                                                               | Cathode-active Catalyst (conductive additives)  | Electrolyte                                                                              | Voltage (V) | Capacity loss (100 cycles) |
|---------------|-----------------------------------------------------------------------------------------------------------------------------------------------------------|-------------------------------------------------|------------------------------------------------------------------------------------------|-------------|----------------------------|
| 1             | Poly(vinylanthraquinone) (ca. 100 nm layer)                                                                                                               | VGCF, MnO <sub>2</sub> , and PVdF               | 30 wt% KOH aqueous solution (pH 14)                                                      | 0.5         | -13%                       |
| 2             | poly(dianthraquinone-substituted norbornene) (ca. 50 nm layer)                                                                                            | VGCF, MnO <sub>2</sub> , and PVdF               | 10 M NaOH aqueous solution                                                               | 0.7         | -3%                        |
| 3             | poly(1,4-anthraquinone) (P14AQ) in situ polymerized on carbon nanotubes (CNTs)                                                                            | spinel cobalt manganese oxide supported on CNTs | 6.0 M KOH aqueous solution                                                               | 0.8         | -5%                        |
| 4             | poly(2,5-dihydroxy-1,4-benzoquinone-3,6-methylene), single-wall carbon nanotube, and poly(vinylidene fluoride)                                            | Pt/C                                            | H <sub>2</sub> SO <sub>4</sub> aqueous solution (pH 1)                                   | 0.4         | -3%                        |
| 5             | a conducting redox polymer based on a trimer of EPE (E=3,4-ethylenedioxythiophene; P=3,4-propylenedioxythiophene) and a naphthoquinone (NQ) pendant group | Pt/C                                            | H <sub>2</sub> SO <sub>4</sub> aqueous solution (pH 1)                                   | 0.5         | -2%                        |
| 6             | naphthoquinone substituted poly(allylamine), single-wall carbon nanotube, and poly(vinylidene fluoride)                                                   | Pt/C                                            | H <sub>2</sub> SO <sub>4</sub> aqueous solution (0.05 M H <sub>2</sub> SO <sub>4</sub> ) | 0.8         | -7%                        |
| This          | 1,8-dihydroxyanthraquinone-                                                                                                                               | Pt/C                                            | H <sub>2</sub> SO <sub>4</sub>                                                           | 1.1         | -2%                        |

|      |                                                                                                |  |                                                                             |  |  |
|------|------------------------------------------------------------------------------------------------|--|-----------------------------------------------------------------------------|--|--|
| work | substituted poly(allylamine),<br>single-wall carbon nanotube,<br>and poly(vinylidene fluoride) |  | aqueous<br>solution<br>(0.5 M<br>H <sub>2</sub> SO <sub>4</sub> )<br>in air |  |  |
|------|------------------------------------------------------------------------------------------------|--|-----------------------------------------------------------------------------|--|--|

## REFERENCES

- (1) Choi, W.; Harada, D.; Oyaizu, K.; Nishide, H. Aqueous electrochemistry of poly(vinylanthraquinone) for anode-active materials in high-density and rechargeable polymer/air batteries. *J Am Chem Soc* **2011**, *133* (49), 19839-43, DOI: 10.1021/ja206961t.
- (2) Kawai, T.; Oyaizu, K.; Nishide, H. High-Density and Robust Charge Storage with Poly(anthraquinone-substituted norbornene) for Organic Electrode-Active Materials in Polymer–Air Secondary Batteries. *Macromolecules* **2015**, *48* (8), 2429-2434
- (3) Li, Y.; Liu, L.; Liu, C.; Lu, Y.; Shi, R.; Li, F.; Chen, J. Rechargeable Aqueous Polymer-Air Batteries Based on Polyanthraquinone Anode. *Chem* **2019**, *5* (8), 2159-2170, DOI: 10.1016/j.chempr.2019.06.001.
- (4) Oka, K.; Furukawa, S.; Murao, S.; Oka, T.; Nishide, H.; Oyaizu, K. Poly(dihydroxybenzoquinone): its high-density and robust charge storage capability in rechargeable acidic polymer-air batteries. *Chem Commun (Camb)* **2020**, *56* (29), 4055-4058, DOI: 10.1039/d0cc00660b.
- (5) Oka, K.; Strietzel, C.; Emanuelsson, R.; Nishide, H.; Oyaizu, K.; Stromme, M.; Sjodin, M. Conducting Redox Polymer as a Robust Organic Electrode-Active Material in Acidic Aqueous Electrolyte towards Polymer-Air Secondary Batteries. *ChemSusChem* **2020**, *13* (9), 2280-2285, DOI: 10.1002/cssc.202000627.
- (6) Oka, K.; Murao, S.; Kobayashi, K.; Nishide, H.; Oyaizu, K. Charge- and Proton-Storage Capability of Naphthoquinone-Substituted Poly(allylamine) as Electrode-Active Material for Polymer–Air Secondary Batteries. *ACS Applied Energy Materials* **2020**, DOI: 10.1021/acsaem.0c02178.
